# Supplementary material for: An Artificial Intelligence Characterised Functional Ingredient, Derived from Rice, Inhibits TNF-α and Significantly Improves Physical Strength in an Inflammaging Population
Source: MDPI journal article supplement (doi:10.3390/foods9091147), 2020-08-20
Supplement: s1 [file s1]

**An AI characterised functional ingredient derived from rice inhibits TNF- $\alpha$  and significantly improves physical strength in an inflammaging population**

Kathy Kennedy<sup>1</sup>, Brian Keogh<sup>1</sup>, Cyril Lopez<sup>1</sup>, Alessandro Adelfio<sup>1</sup>, Brendan Molloy<sup>1</sup>, Alish Kerr<sup>1</sup>, Audrey M. Wall<sup>\*1</sup>, Gał Jalowicki<sup>1</sup>, Thérèse A. Holton<sup>1</sup> and Nora Khaldi<sup>1</sup>

<sup>1</sup> Nuritas Ltd, Joshua Dawson House,  
Dawson St, Dublin 2, D02 RY95, Ireland.

Supplementary Materials

**\*Corresponding Author**

Audrey Wall

Email: [wall.audrey@nuritas.com](mailto:wall.audrey@nuritas.com)

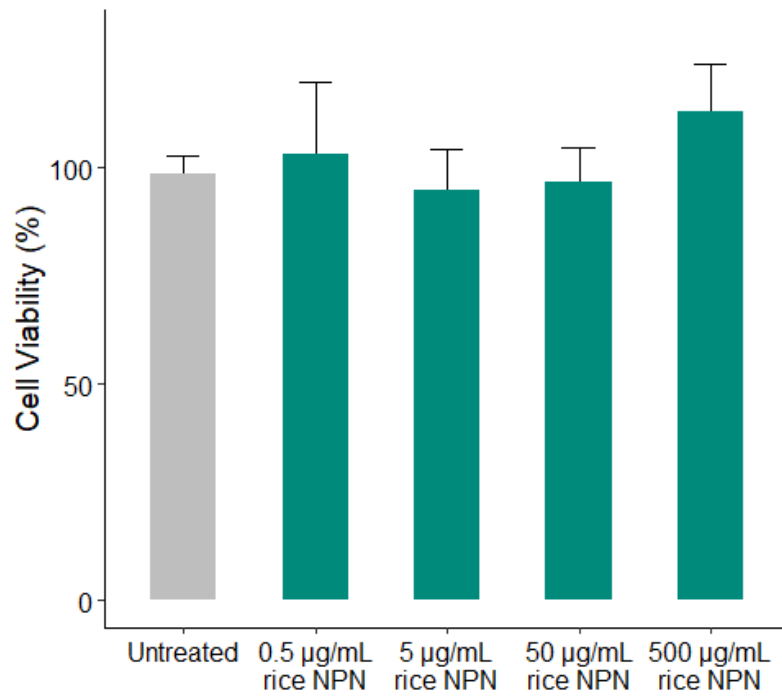

**Figure S1. Cell viability following rice NPN treatment.** Percentage viability of Thp-1 cells with increasing concentrations of rice NPN. Data presented are the mean  $\pm$  SEM of at least 2 individual experiments carried out in at least triplicate.



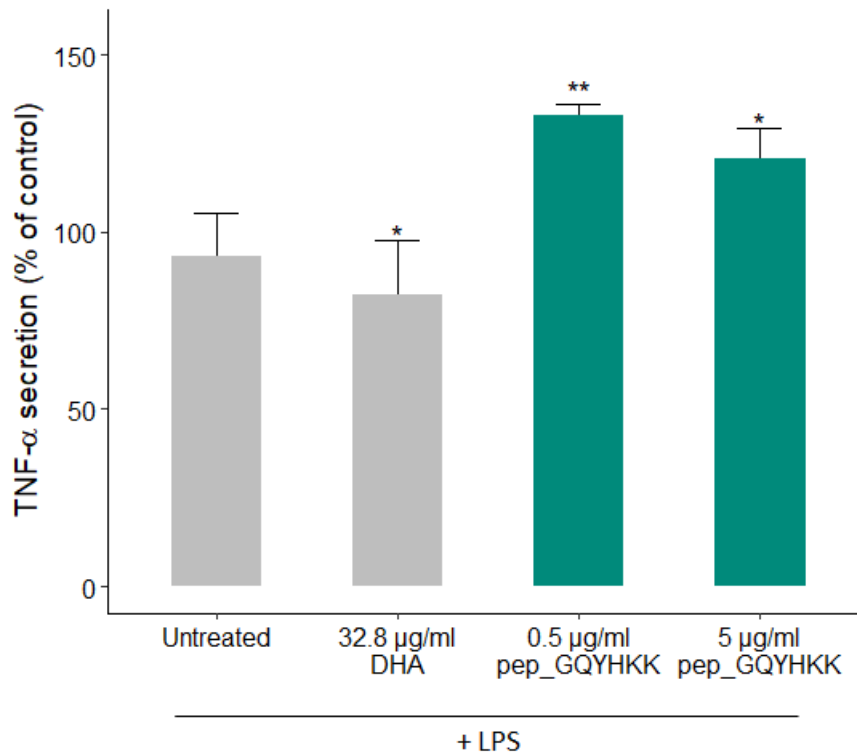

**Figure S3: Predicted peptide did not reduce LPS induced TNF- $\alpha$  secretion.** Treatment with constituent peptide, pep\_GQYHKK, did not reduce the secretion of TNF- $\alpha$  in THP-1 differentiated macrophages after treatment with LPS. THP-1 macrophages were treated with predicted peptide (0.5 - 5  $\mu$ g/mL) for 24 hours before treating with 100 ng/mL of LPS for 24 hours. The secretion of TNF- $\alpha$  was quantified by ELISA. Data presented are the mean  $\pm$ SEM of 1 independent experiment in triplicate (\*P <0.05 \*\*P <0.0

**Table S1** Subject Anthropometric Data

|                                               | All                    | Male             | Female            |
|-----------------------------------------------|------------------------|------------------|-------------------|
| Gender n (%)                                  | 40 (100%)              | 15 (37.5%)       | 25 (62.5%)        |
| Age (years)<br>(Mean $\pm$ S.E.)              | 68.49 $\pm$ 0.51       | 69.34 $\pm$ 0.86 | 67.99 $\pm$ 0.62  |
| Weight (Kg)<br>(Mean $\pm$ S.E.)              | 74.42 $\pm$ 1.71       | 80.74 $\pm$ 2.73 | 71.2 $\pm$ 1.79   |
| Height (m)<br>(Mean $\pm$ S.E.)               | 1.67 $\pm$ 0.01        | 1.73 $\pm$ 0.01  | 1.63 $\pm$ 0.01   |
| BMI (Kg/m <sup>2</sup> )<br>(Mean $\pm$ S.E.) | 26.65 $\pm$ 0.42       | 26.87 $\pm$ 0.67 | 26.52 $\pm$ 0.56  |
| Respiratory Rate<br>(Mean $\pm$ S.E.)         | 16.85 $\pm$ 0.31       | 17.2 $\pm$ 0.48  | 16.63 $\pm$ 0.4   |
| Blood pressure<br>(Mean $\pm$ S.E.)           |                        |                  |                   |
| Diastolic                                     | 80.48 $\pm$ 1.56       | 81.8 $\pm$ 3.2   | 79.68 $\pm$ 1.65  |
| Systolic                                      | 131.0 $\pm$ 2.52       | 132.6 $\pm$ 4.05 | 130.04 $\pm$ 3.27 |
|                                               |                        | Treatment        | Placebo           |
| <b>Adverse events</b>                         | Nausea and loose stool | 3                | 0                 |
|                                               | Indigestion            | 1                | 1                 |
|                                               | Constipation           | 1                | 0                 |
|                                               | Rash / Joint Pain      | 0                | 1                 |
| <b>Serious Adverse Events</b>                 |                        | None             | None              |

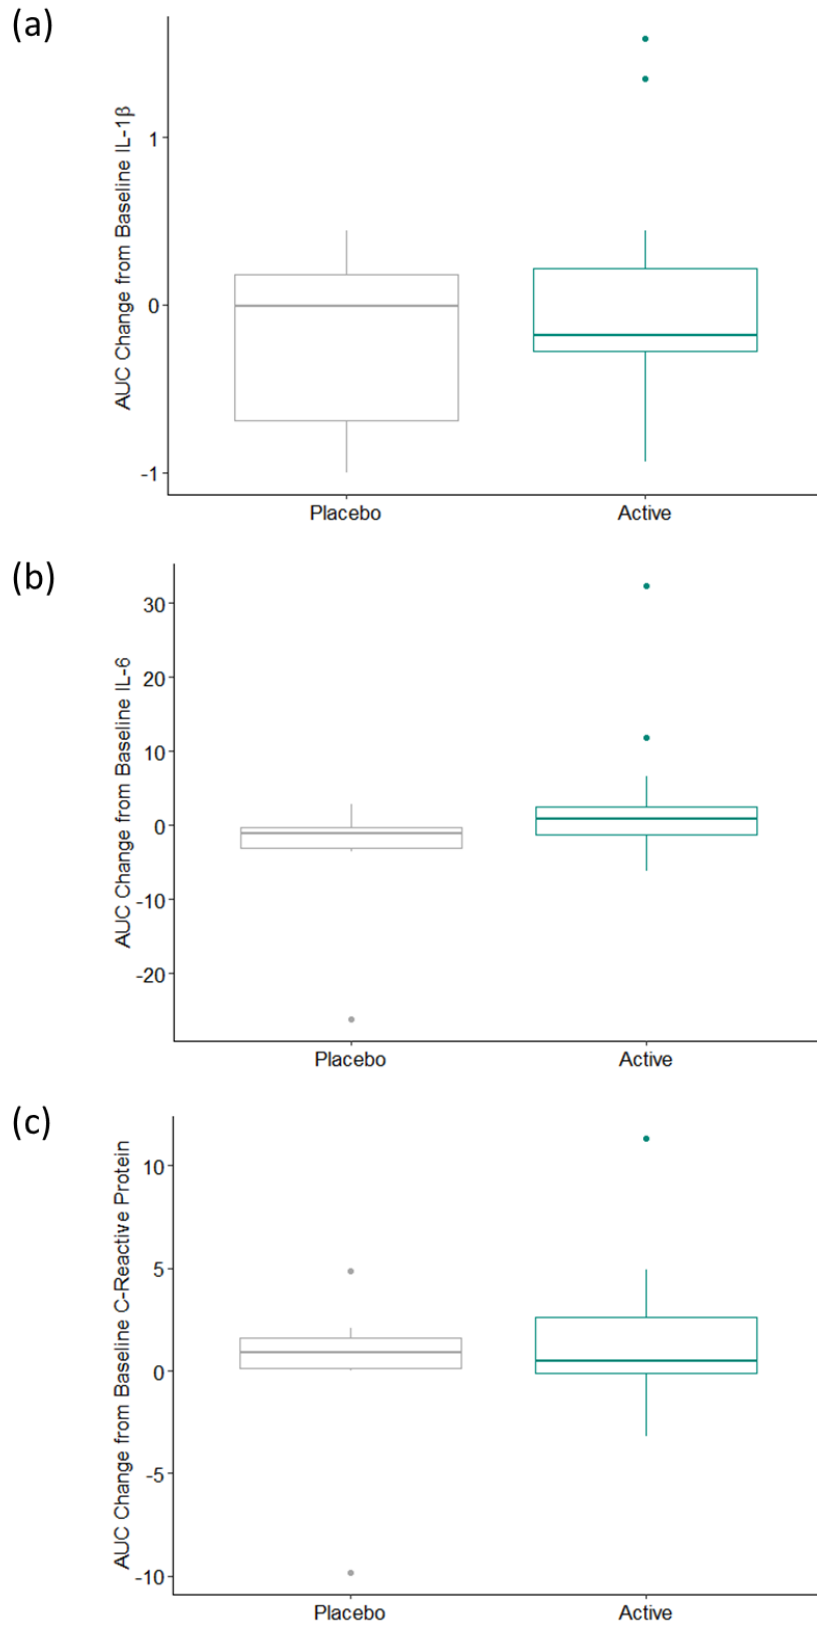

**Figure S4:** AUC change from baseline for (a) IL-1 $\beta$ , (b) IL-6 and (c) C-Reactive Protein.
